# Supplementary material for: Blumenols as shoot markers of root symbiosis with arbuscular mycorrhizal fungi
Source: eLife. 2018 Aug 28;7:e37093. doi: 10.7554/eLife.37093 (PMC6156081; doi:10.7554/eLife.37093)
Supplement: Figure 2—figure supplement 1—source data 1. [file elife-37093-fig2-figsupp1-data1.xlsx]

## Sheet: Figure 2—figure supplement 1
Figure 2—figure supplement 1A
Genotype	treatment	time	Compound1	Compound2	Compound3	Compound4	Compound5	Compound6
EV	None AMF	3wpi	42047	0	0	72114.1	35570.5	738.255
EV	None AMF	3wpi	32312	0	0	26456.5	31681.7	0
EV	None AMF	3wpi	62959	0	0	30782.3	42823.1	0
EV	R.irregularis	3wpi	323333	0	28365.4	300128	102436	4358.97
EV	R.irregularis	3wpi	1179000	0	74178.6	567964	280750	4607.14
EV	R.irregularis	3wpi	1902532	0	202595	1.79215e+06	416203	4683.54
EV	None AMF	4wpi	0	0	0	30759.5	36012.7	2626.58
EV	None AMF	4wpi	0	0	0	31898.7	38006.3	5189.87
EV	None AMF	4wpi	0	0	0	31300.7	37012.4	3900.24
EV	R.irregularis	4wpi	2985574	270203	171284	1.73672e+06	349189	7094.59
EV	R.irregularis	4wpi	2409908	232699	239325	908957	238006	6257.67
EV	R.irregularis	4wpi	3047720	342796	394681	2.44793e+06	299119	6261.4
EV	None AMF	5wpi	92958	0	0	87266.9	35948.6	3504.82
EV	None AMF	5wpi	89626	0	0	40280.4	31651.1	6199.38
EV	None AMF	5wpi	226609	0	17993.1	95121.1	47058.8	2525.95
EV	R.irregularis	5wpi	4923774	803419	542645	3.83232e+06	533645	3483.87
EV	R.irregularis	5wpi	6163509	799565	640248	4.60612e+06	847764	8074.53
EV	R.irregularis	5wpi	11604200	1.94263e+06	1.51057e+06	9082300	1.04513e+06	3600
EV	R.irregularis	5wpi	5991701	736667	665170	4.9349e+06	599558	5442.18
EV	R.irregularis	5wpi	23258984	2.99043e+06	2.96007e+06	2.17961e+07	3.0523e+06	8852.46
EV	R.irregularis	5wpi	13151871	1.73636e+06	1.07395e+06	9.40082e+06	1.41629e+06	8537.41
EV	None AMF	6wpi	82605	0	0	100450	46077.2	0
EV	None AMF	6wpi	32075	0	0	33877.6	30816.3	4625.85
EV	None AMF	6wpi	25186	0	0	26366.5	29844.7	3850.93
EV	R.irregularis	6wpi	24142331	3.03814e+06	3.62828e+06	2.25196e+07	7308750	3783.78
EV	R.irregularis	6wpi	36563937	4.28737e+06	3.60679e+06	2.63567e+07	6.06921e+06	5269.84
EV	R.irregularis	6wpi	65203135	9.1396e+06	7.19927e+06	5.18765e+07	8.38686e+06	10561.1
EV	R.irregularis	6wpi	27388938	3443875	3.42834e+06	1.77139e+07	3.93053e+06	8718.75
EV	R.irregularis	6wpi	13684430	1.18302e+06	2.26302e+06	1.44291e+07	2.27148e+06	5805.37
EV	None AMF	7wpi	21917	0	0	56485.6	21533.5	2747.6
EV	None AMF	7wpi	30823	0	0	73658.5	23292.7	2134.15
EV	None AMF	7wpi	23765	0	0	64814.8	20648.1	3117.28
EV	None AMF	7wpi	21722	0	0	61092.7	24404	2516.56
EV	R.irregularis	7wpi	29740032	2.87341e+06	9.95016e+06	3.70121e+07	8.63959e+06	8853.5
EV	R.irregularis	7wpi	93460030	1.80898e+07	4.95431e+07	7.32623e+07	1.23846e+07	6097.56
EV	R.irregularis	7wpi	54948369	8544800	1.09801e+07	1.13295e+08	1.40341e+07	8830.77
EV	R.irregularis	7wpi	30613558	3.39957e+06	7.11209e+06	5.67115e+07	1.19566e+07	5674.85
EV	R.irregularis	7wpi	68310320	7.22302e+06	1.45807e+07	7.87916e+07	8.70831e+06	12064
Figure 2—figure supplement 1B
Content						Transcripts abundance
Compound1	Compound2	Compound3	Compound4	Compound5		Ri-tub	RAM1	STR1	PT4	Vapyrin
0	42047	0	72114.1	35570.5		0	1	0	0	4
0	32312.3	0	26456.5	31681.7		0	1	0	0	2
0	62959.2	0	30782.3	42823.1		0	1	2	0	2
0	72225.8	0	90903.2	55225.8		3	3	4	1	3
0	323333	28365.4	300128	102436		28	6	15	6	6
0	87177.9	0	65030.7	54110.4		8	7	10	3	6
0	1179000	74178.6	567964	280750		24	23	29	18	10
0	1.90253e+06	202595	1.79215e+06	416203		47	42	58	33	13
0	59542.5	0	79313.7	57843.1		5	2	4	1	2
0	0	0	31898.7	38006.3		0	1	1	0	3
270203	2.98557e+06	171284	1.73672e+06	349189		120	41	69	53	12
232699	2.40991e+06	239325	908957	238006		69	65	92	57	14
342796	3.04772e+06	394681	2.44793e+06	299119		77	32	56	41	7
1.25172e+06	1.27576e+07	485956	7.0047e+06	1.36132e+06		165	134	232	124	29
0	92958.2	0	87266.9	35948.6		2	3	3	1	4
0	89626.2	0	40280.4	31651.1		1	3	2	0	5
0	226609	17993.1	95121.1	47058.8		3	4	5	1	3
803419	4.92377e+06	542645	3.83232e+06	533645		97	131	218	68	26
6.46706e+06	3.4591e+07	3.21664e+06	2.30384e+07	2.4509e+06		402	488	676	201	71
823825	9.5062e+06	485843	5.43443e+06	907470		74	92	91	28	16
799565	6.16351e+06	640248	4.60612e+06	847764		130	122	189	52	23
1.94263e+06	11604200	1.51057e+06	9082300	1.04513e+06		168	249	338	94	45
736667	5.9917e+06	665170	4.9349e+06	599558		63	70	111	25	14
2.99043e+06	2.3259e+07	2.96007e+06	2.17961e+07	3.0523e+06		168	212	290	78	34
1.73636e+06	1.31519e+07	1.07395e+06	9.40082e+06	1.41629e+06		105	117	168	39	25
0	82604.5	0	100450	46077.2		1	1	3	0	2
0	32074.8	0	33877.6	30816.3		1	0	1	0	1
3.03814e+06	2.41423e+07	3.62828e+06	2.25196e+07	7308750		198	218	267	75	41
4.28737e+06	3.65639e+07	3.60679e+06	2.63567e+07	6.06921e+06		296	357	461	141	56
1.56896e+06	1.38337e+07	1.88291e+06	1.1685e+07	3.22201e+06		139	144	186	57	29
9.1396e+06	6.52031e+07	7.19927e+06	5.18765e+07	8.38686e+06		592	617	653	269	89
3443875	2.73889e+07	3.42834e+06	1.77139e+07	3.93053e+06		191	218	242	79	38
1.18302e+06	1.36844e+07	2.26302e+06	1.44291e+07	2.27148e+06		185	223	324	74	43
1.02551e+07	6.99918e+07	6.29349e+06	4.85548e+07	6.76398e+06		832	760	1017	380	101
2.87341e+06	2.974e+07	9.95016e+06	3.70121e+07	8.63959e+06		495	388	422	161	64
1.80898e+07	9.346e+07	4.95431e+07	7.32623e+07	1.23846e+07		1097	787	885	215	115
8544800	5.49484e+07	1.09801e+07	1.13295e+08	1.40341e+07		1144	765	879	272	104
3.39957e+06	3.06136e+07	7.11209e+06	5.67115e+07	1.19566e+07		393	416	541	139	71
7.22302e+06	6.83103e+07	1.45807e+07	7.87916e+07	8.70831e+06		792	413	37	154	67
469103	1.38376e+07	2.34744e+06	8.69381e+06	2.13365e+06		179	39	62	28	12
