# Supplementary material for: Blumenols as shoot markers of root symbiosis with arbuscular mycorrhizal fungi
Source: eLife. 2018 Aug 28;7:e37093. doi: 10.7554/eLife.37093 (PMC6156081; doi:10.7554/eLife.37093)
Supplement: Figure 2—source data 1. [file elife-37093-fig2-data1.xlsx]

## Sheet: Figure 2
Figure 2c
Genotype	treatment	compound 1	compound 2
irCCaMK	R.irregularis	10971.3	427.874
irCCaMK	R.irregularis	14415.4	406.214
irCCaMK	R.irregularis	32725.4	338.669
irCCaMK	R.irregularis	20619.5	362.137
irCCaMK	R.irregularis	19279.6	556.171
irCCaMK	R.irregularis	13471.3	120.84
irCCaMK	R.irregularis	33426.6	1111.03
irCCaMK	R.irregularis	14492.2	40.3764
irCCaMK	Control	0	0
irCCaMK	Control	0	0
irCCaMK	Control	10.3451	0
irCCaMK	Control	0	0
irCCaMK	Control	0	0
irCCaMK	Control	0	0
irCCaMK	Control	0	0
irCCaMK	Control	0	0
EV	R.irregularis	80738.3	5349.87
EV	R.irregularis	89291.5	3214.53
EV	R.irregularis	86634.3	3756
EV	R.irregularis	74227.2	3579.54
EV	R.irregularis	106857	4485.33
EV	R.irregularis	78625.8	3055.12
EV	R.irregularis	89915.3	6047.43
EV	R.irregularis	85220.4	5219.01
EV	Control	0	0
EV	Control	2.31872	0
EV	Control	0	0
EV	Control	8.22027	121.57
EV	Control	6.28464	0
EV	Control	8.19375	0
EV	Control	17.4432	12.472
EV	Control	0	0
