# Supplementary material for: Blumenols as shoot markers of root symbiosis with arbuscular mycorrhizal fungi
Source: eLife. 2018 Aug 28;7:e37093. doi: 10.7554/eLife.37093 (PMC6156081; doi:10.7554/eLife.37093)
Supplement: Figure 3—figure supplement 2—source data 1. [file elife-37093-fig3-figsupp2-data1.xlsx]

## Sheet: Figure 3—figure supplement 2 
Figure 3—figure supplement 2A									Figure 3—figure supplement 2B					Figure 3—figure supplement 2C
Slide	Genotype	time	Total	H	HA	HV	HAV		Genotype	time	root_compound1	root_compound2		Genotype	time	leaf_compound1	leaf_compound2
3	EV	2wpi	0.18	0.15	0.01	0.02	0		EV	2wpi	15.1925	0		EV	2wpi	0	0
4	EV	2wpi	0.17	0.12	0.02	0.03	0		EV	2wpi	21.9719	0		EV	2wpi	0	0
9	EV	2wpi	0.13	0.11	0.01	0.01	0		EV	2wpi	16.0931	0		EV	2wpi	0	0
12	EV	2wpi	0.23	0.21	0.02	0	0		EV	2wpi	62.9559	0		EV	2wpi	0	0
17	EV	2wpi	0.21	0.16	0.02	0.03	0		EV	2wpi	12.5389	0		EV	2wpi	0	0
24	EV	2wpi	0.24	0.24	0	0	0		EV	2wpi	24.9059	0		EV	2wpi	0	0
26	EV	2wpi	0.18	0.17	0	0.01	0		EV	2wpi	18.2044	0		EV	2wpi	0	0
30	EV	2wpi	0.12	0.1	0	0.01	0.01		EV	2wpi	22.3308	0		EV	2wpi	0	0
36	EV	3wpi	0.46	0.37	0.01	0.06	0.02		EV	3wpi	392.458	21.2608		EV	3wpi	190159	33188.9
37	EV	3wpi	0.34	0.23	0	0.09	0.02		EV	3wpi	352.898	16.1252		EV	3wpi	189703	28944.2
39	EV	3wpi	0.33	0.23	0.04	0.03	0.03		EV	3wpi	361.027	16.7302		EV	3wpi	177799	25153.3
42	EV	3wpi	0.38	0.09	0.05	0.08	0.16		EV	3wpi	474.596	29.6934		EV	3wpi	173931	24144.2
50	EV	3wpi	0.68	0.25	0.14	0.09	0.2		EV	3wpi	673.007	34.9878		EV	3wpi	165784	19654.9
52	EV	3wpi	0.51	0.24	0.11	0.05	0.11		EV	3wpi	161.051	10.7886		EV	3wpi	125871	17731.9
56	EV	3wpi	0.36	0.21	0.08	0.04	0.03		EV	3wpi	129.893	12.8529		EV	3wpi	122685	15495.9
57	EV	3wpi	0.54	0.3	0.08	0.05	0.11		EV	3wpi	231.147	13.7157		EV	3wpi	93387.2	13417.9
63	EV	4wpi	0.67	0.29	0.1	0.05	0.23		EV	4wpi	2097.68	122.952		EV	4wpi	977402	255295
68	EV	4wpi	0.82	0.24	0.16	0.05	0.37		EV	4wpi	2384.74	159.148		EV	4wpi	803282	230316
74	EV	4wpi	0.81	0.4	0.08	0.1	0.23		EV	4wpi	1601.84	103.015		EV	4wpi	788239	222387
75	EV	4wpi	0.77	0.2	0.11	0.06	0.4		EV	4wpi	1583.12	82.201		EV	4wpi	708260	211884
81	EV	4wpi	0.69	0.19	0.18	0.06	0.26		EV	4wpi	2186.13	123.107		EV	4wpi	674867	205842
83	EV	4wpi	0.69	0.16	0.16	0.06	0.31		EV	4wpi	2370.71	137.651		EV	4wpi	547292	117902
86	EV	4wpi	0.31	0.13	0.08	0.04	0.06		EV	4wpi	2007.81	133.319		EV	4wpi	525840	115149
87	EV	4wpi	0.62	0.15	0.15	0.06	0.26		EV	5wpi	8040.09	647.896		EV	4wpi	386295	71893.3
95	EV	5wpi	0.88	0.11	0.11	0.08	0.58		EV	5wpi	9644.45	584.317		EV	5wpi	1.55686e+06	708204
97	EV	5wpi	0.78	0.23	0.29	0.04	0.22		EV	5wpi	4377.22	295.745		EV	5wpi	1.42667e+06	693588
100	EV	5wpi	0.86	0.18	0.27	0.09	0.32		EV	5wpi	7254.11	427.252		EV	5wpi	1.35085e+06	665447
107	EV	5wpi	0.86	0.41	0.18	0.04	0.23		EV	5wpi	7754.88	689.95		EV	5wpi	1.09284e+06	506266
110	EV	5wpi	0.91	0.11	0.11	0.14	0.55		EV	5wpi	8766.69	681.142		EV	5wpi	672632	349021
111	EV	5wpi	0.98	0.18	0.14	0.07	0.59		EV	5wpi	9390.79	630.211
117	EV	5wpi	0.61	0.21	0.25	0.01	0.14
120	EV	5wpi	0.87	0.13	0.12	0.12	0.5
