# Supplementary material for: Blumenols as shoot markers of root symbiosis with arbuscular mycorrhizal fungi
Source: eLife. 2018 Aug 28;7:e37093. doi: 10.7554/eLife.37093 (PMC6156081; doi:10.7554/eLife.37093)
Supplement: Figure 3—figure supplement 3—source data 1. [file elife-37093-fig3-figsupp3-data1.xlsx]

## Sheet: Figure 3—figure supplement 3
Figure 3—figure supplement 3A							Figure 3—figure supplement 3B				Figure 3—figure supplement 3C
Genotype	None=1-Total	H	H+A	A	H+A+V		Genotype	Ri_tub	PT4		Genotype	Leaf_compound1	root_compound1
irCCaMK#1208-6	126	0	0	0	0		EV	0.80107	1.13288		EV	258.32	22160.5
irCCaMK#1208-6	134	0	0	3	0		EV	0.946058	0.63728		EV	278.238	46909.8
irCCaMK#1208-6	127	0	1	1	0		EV	0.952638	1.02811		EV	279.231	39265.5
irCCaMK#1208-6	145	0	0	0	0		EV	1.1487	1.16473		EV	423.645	54664
irCCaMK#1208-6	132	0	0	0	0		EV	1.10191	0.870551		EV	688.071	45424.8
irCCaMK#1208-6	142	0	0	0	0		EV	1.07177	1.33793		EV	349.968	48433.6
irCCaMK#1208-6	117	1	0	6	0		irCCaMK#1208-6	0.000396608	0.000584706		EV	183.502
EV009	22	5	16	5	16		irCCaMK#1208-6	0.00264962	0.00257716		EV	758.64
EV009	27	7	13	8	14		irCCaMK#1208-6	0.000700173	0.00105393		EV	936.743
EV009	34	4	17	7	12		irCCaMK#1208-6	0.000917503	0.000613776		EV	589.547
EV009	27	12	5	2	9		irCCaMK#1208-6	0.00113744	0.00136205		EV	363.062
EV009	48	10	7	6	6		irCCaMK#1208-6	0.00138107	0.00163103		EV	411.398
EV009	19	19	2	10	27						irCCaMK#1208-6	0	0
EV009	27	9	9	8	8						irCCaMK#1208-6	0	0
EV009	23	13	10	5	22						irCCaMK#1208-6	0	0
EV009	12	23	11	11	16						irCCaMK#1208-6	0	0
											irCCaMK#1208-6	0	0
											irCCaMK#1208-6	0	0
											irCCaMK#1208-6	0
											irCCaMK#1208-6	0
