# Supplementary material for: Blumenols as shoot markers of root symbiosis with arbuscular mycorrhizal fungi
Source: eLife. 2018 Aug 28;7:e37093. doi: 10.7554/eLife.37093 (PMC6156081; doi:10.7554/eLife.37093)
Supplement: Figure 3—source data 1. [file elife-37093-fig3-data1.xlsx]

## Sheet: Figure 3
Figure 3A						Figure 3B					Figure 3C					Figure 3D				Figure 3F					Figure 3G
Genotype	Treatment	Time	Compund 1	Compund 2		Genotype	AMF concentration	Compund 1	Compund 2		Genotype	Treatment	Compound1	Compound2		Genotype	Compound1	Compound2		AM structure	RLC (%)	Compund 1	Compund 2		Treatment	Tissue	Compund 1	Compund 2
irCCaMK	R.irregularis	2wpi	0	0		EV	Control	0	0		EV	R.irregularis	393977	724586		EV	66276	102074		T	18.1818	3612.22	0		R.irregularis	R5	56.2509	29.3769
irCCaMK	R.irregularis	2wpi	0	0		EV	Control	0	0		EV	R.irregularis	430605	855176		EV	16125	51575		T	11.8421	0	0		R.irregularis	R5	59.2383	35.7293
irCCaMK	R.irregularis	2wpi	0	0		EV	Control	0	0		EV	R.irregularis	435789	934965		EV	28182	96709		T	8.86076	0	9633.24		R.irregularis	R5	53.9867	28.9388
irCCaMK	R.irregularis	2wpi	0	0		EV	Control	0	0		EV	R.irregularis	392818	887997		EV	13568	62167		T	13.7255	0	0		R.irregularis	R4	67.988	35.5232
irCCaMK	R.irregularis	2wpi	0	0		EV	Control	0	0		EV	R.irregularis	377276	983502		EV	17174	19220		T	12.6984	2726.65	0		R.irregularis	R4	72.5267	41.4337
irCCaMK	R.irregularis	2wpi	0	0		EV	Control	0	0		EV	R.irregularis	394016	1.12656e+06		EV	18719	27656		T	12.5	0	14952.5		R.irregularis	R4	53.3472	28.147
irCCaMK	R.irregularis	2wpi	0	0		EV	Control	0	0		EV	R.irregularis	306401	611521		EV	18224	38443		T	13.4615	3831.55	0		R.irregularis	R3	88.5716	43.865
irCCaMK	R.irregularis	2wpi	0	0		EV	Control	0	0		EV	R.irregularis	369946	1.00598e+06		EV	18722	56807		T	13.5135	0	39733.7		R.irregularis	R3	97.9037	50.4791
EV	R.irregularis	2wpi	39733.7	3831.55		EV	R.irr_1	1.13756e+06	863944		EV	R.irregularis	124335	279327		EV	15987	25934		T	20.2899	19654.9	125871		R.irregularis	R3	44.3107	24.7001
EV	R.irregularis	2wpi	14952.5	3612.22		EV	R.irr_1	2.09834e+06	1.08103e+06		EV	R.irregularis	295110	806333		EV	11177	31302		T	37.2881	13417.9	93387.2		R.irregularis	R2	71.5726	36.0157
EV	R.irregularis	2wpi	9633.24	2726.65		EV	R.irr_1	2.75369e+06	1.11002e+06		EV	None AMF	0	0		EV	15092	74815		T	40.8451	17731.9	177799		R.irregularis	R2	102.771	43.4278
EV	R.irregularis	2wpi	0	0		EV	R.irr_1	3.30851e+06	1.34146e+06		EV	None AMF	0	0		EV	8908	85969		T	57.3171	24144.2	122685		R.irregularis	R2	44.6958	22.9323
EV	R.irregularis	2wpi	0	0		EV	R.irr_1	3.5317e+06	1.4154e+06		EV	None AMF	0	0		EV	57554	51646		T	55.9524	25153.3	173931		R.irregularis	R1	87.2711	30.2285
EV	R.irregularis	2wpi	0	0		EV	R.irr_1	3.60752e+06	1.64524e+06		EV	None AMF	0	0		EV	73329	89017		T	27.7778	33188.9	189703		R.irregularis	R1	97.9934	39.1767
EV	R.irregularis	2wpi	0	0		EV	R.irr_1/10	1.10769e+06	626323		EV	None AMF	0	0		EV	57835	62367		T	26.3158	15495.9	165784		R.irregularis	R1	48.1617	30.4592
EV	R.irregularis	2wpi	0	0		EV	R.irr_1/10	1.32089e+06	787287		EV	None AMF	0	0		EV	89556	78135		T	27.2727	28944.2	190159		R.irregularis	S1	74	37.2528
EV	None AMF	2wpi	0	4340.3		EV	R.irr_1/10	1.9327e+06	1.12905e+06		EV	None AMF	0	0		EV	55753	84694		T	53.5714	117902	386295		R.irregularis	S1	100.06	36.1955
EV	None AMF	2wpi	0	0		EV	R.irr_1/20	744752	287163		EV	None AMF	0	0		EV	9068	196997		T	62.3188	211884	708260		R.irregularis	S1	42.0498	24.35
EV	None AMF	2wpi	0	0		EV	R.irr_1/20	786028	439100		EV	None AMF	0	0		EV	12017	126467		T	64.7541	255295	977402		R.irregularis	S2	59.391	30.3248
EV	None AMF	2wpi	0	0		EV	R.irr_1/20	920471	461598		EV	None AMF	0	0		EV	20979	168082		T	65.9259	205842	674867		R.irregularis	S2	87.0814	37.9468
EV	None AMF	2wpi	0	0		EV	R.irr_1/20	1.29789e+06	810421		irCCaMK	R.irregularis	0	0		irCCaMK	2127	0		T	62.2642	222387	803282		R.irregularis	S2	44.2027	21.5108
EV	None AMF	2wpi	0	0		EV	R.irr_1/20	1.30527e+06	977817		irCCaMK	R.irregularis	0	0		irCCaMK	19824	0		T	55	71893.3	547292		R.irregularis	S3	86.2656	33.8812
irCCaMK	R.irregularis	3wpi	0	4436.38		EV	R.irr_1/20	1.70586e+06	1.00894e+06		irCCaMK	R.irregularis	0	0		irCCaMK	7151	0		T	26.0417	115149	525840		R.irregularis	S3	80.1254	45.154
irCCaMK	R.irregularis	3wpi	0	3748.95		EV	R.irr_1/40	217639	55409.2		irCCaMK	R.irregularis	0	0		irCCaMK	5475	0		T	87.8049	230316	788239		R.irregularis	S3	120.574	30.4251
irCCaMK	R.irregularis	3wpi	0	0		EV	R.irr_1/40	624491	241790		irCCaMK	R.irregularis	0	0		irCCaMK	5666	0		T	51.9084	665447	1.35085e+06		R.irregularis	S4	54.937	38.7486
irCCaMK	R.irregularis	3wpi	0	0		EV	R.irr_1/40	676391	266397		irCCaMK	R.irregularis	0	0		irCCaMK	8829	0		T	70.5521	186850	504482		R.irregularis	S4	74.5819	58.2731
irCCaMK	R.irregularis	3wpi	0	0		EV	R.irr_1/40	1.24312e+06	302952		irCCaMK	R.irregularis	0	0		irCCaMK	9015	0		T	75.2874	506266	1.09284e+06		R.irregularis	S4	38.0319	29.3967
irCCaMK	R.irregularis	3wpi	0	0		EV	R.irr_1/40	1.28278e+06	354346		irCCaMK	R.irregularis	0	0		irCCaMK	6853	0		T	84	729204	2.85759e+06		R.irregularis	S5	78.1129	53.4791
irCCaMK	R.irregularis	3wpi	0	0		EV	R.irr_1/60	208496	96787.6		irCCaMK	R.irregularis	0	0		irCCaMK	5617	0		T	95.6044	708204	1.42667e+06		R.irregularis	S5	50.0252	42.0897
irCCaMK	R.irregularis	3wpi	0	0		EV	R.irr_1/60	417773	136524		irCCaMK	R.irregularis	0	0		irCCaMK	3807	0		T	52.9801	349021	672632		R.irregularis	S5	25.015	30.15
EV	R.irregularis	3wpi	190159	33188.9		EV	R.irr_1/60	568235	187698		irCCaMK	None AMF	0	0		irCCaMK	4765	0		T	90.566	693588	1.55686e+06		R.irregularis	S6	51.7498	60.2981
EV	R.irregularis	3wpi	189703	28944.2		EV	R.irr_1/60	649907	212912		irCCaMK	None AMF	0	0		irCCaMK	9337	0		T	73.743	187698	649907		R.irregularis	S6	59.881	64.3951
EV	R.irregularis	3wpi	177799	25153.3		EV	R.irr_1/60	883295	278943		irCCaMK	None AMF	0	0		irCCaMK	2596	0		T	56.7164	278943	883295		R.irregularis	S6	24.5275	36.3065
EV	R.irregularis	3wpi	173931	24144.2		EV	R.irr_1/60	976997	444300		irCCaMK	None AMF	0	0		irCCaMK	4693	0		T	48.9209	136524	417773		R.irregularis	S7	47.4515	58.4733
EV	R.irregularis	3wpi	165784	19654.9							irCCaMK	None AMF	0	0		irCCaMK	3518	0		T	79.235	444300	976997		R.irregularis	S7	61.4925	66.2798
EV	R.irregularis	3wpi	125871	17731.9							irCCaMK	None AMF	0	0		irCCaMK	23470	0		T	68.9266	266397	1.24312e+06		R.irregularis	S7	30.6764	25.8098
EV	R.irregularis	3wpi	122685	15495.9							irCCaMK	None AMF	0	0		irCCaMK	0	0		T	77.9141	1.20427e+06	3.11165e+06		R.irregularis	FB	4.33143	9.38151
EV	R.irregularis	3wpi	93387.2	13417.9							irCCaMK	None AMF	0	0						T	49.5652	0	61885.2		R.irregularis	FB	4.72819	11.707
EV	None AMF	3wpi	0	1981.91							irCCaMK	None AMF	0	0						T	68.8889	302952	624491		R.irregularis	FB	4.644	10.6685
EV	None AMF	3wpi	0	0							irCCaMK	None AMF	0	0						T	69.5122	1.09395e+06	1.7556e+06		R.irregularis	F	2.94348	11.8577
EV	None AMF	3wpi	0	0																T	61.5385	439100	786028		R.irregularis	F	2.808	9.18625
EV	None AMF	3wpi	0	0																T	70.9302	792695	2.43634e+06		R.irregularis	F	0	5.57301
EV	None AMF	3wpi	0	0																T	74	977817	1.29789e+06		R.irregularis	C	0.402144	3.52777
EV	None AMF	3wpi	0	0																T	84.1176	1.12905e+06	1.9327e+06		R.irregularis	C	2.95132	6.3456
irCCaMK	R.irregularis	4wpi	0	0																T	86.5672	626323	1.32089e+06		R.irregularis	C	1.30313	4.03683
irCCaMK	R.irregularis	4wpi	0	0																T	64.6465	538438	846546		R.irregularis	ST	10.0641	7.55625
irCCaMK	R.irregularis	4wpi	0	0																T	77.7778	787287	1.10769e+06		R.irregularis	ST	15.9947	15.6477
irCCaMK	R.irregularis	4wpi	0	0																T	90.7104	1.4154e+06	3.5317e+06		R.irregularis	ST	6.50933	8.16274
irCCaMK	R.irregularis	4wpi	0	0																T	95.2381	863944	1.13756e+06		R.irregularis	ROOT	26.1474	41.4776
irCCaMK	R.irregularis	4wpi	0	0																T	93.0435	1.34146e+06	3.60752e+06		R.irregularis	ROOT	28.2306	69.4229
irCCaMK	R.irregularis	4wpi	0	0																T	98.4848	1.08103e+06	2.75369e+06		R.irregularis	ROOT	28.5901	60.6613
irCCaMK	R.irregularis	4wpi	0	0																H	16.8831	3612.22	0		None AMF	R5	0	0
EV	R.irregularis	4wpi	977402	255295																H	9.21053	0	0		None AMF	R4	0	0
EV	R.irregularis	4wpi	803282	230316																H	7.59494	0	9633.24		None AMF	R3	0	0
EV	R.irregularis	4wpi	788239	222387																H	6.86275	0	0		None AMF	R2	0	0
EV	R.irregularis	4wpi	708260	211884																H	11.1111	2726.65	0		None AMF	R1	0	0
EV	R.irregularis	4wpi	674867	205842																H	7.14286	0	14952.5		None AMF	S1	0	0
EV	R.irregularis	4wpi	547292	117902																H	11.5385	3831.55	0		None AMF	S2	0	0
EV	R.irregularis	4wpi	525840	115149																H	12.1622	0	39733.7		None AMF	S3	0	0
EV	R.irregularis	4wpi	386295	71893.3																H	4.34783	19654.9	125871		None AMF	S4	0	0.220236
EV	None AMF	4wpi	0	0																H	13.5593	13417.9	93387.2		None AMF	S5	0	0
EV	None AMF	4wpi	0	0																H	12.6761	17731.9	177799		None AMF	S6	0	0
EV	None AMF	4wpi	0	0																H	4.87805	24144.2	122685		None AMF	S7	0	0
EV	None AMF	4wpi	0	0																H	5.95238	25153.3	173931		None AMF	FB	0	0
EV	None AMF	4wpi	0	0																H	5.55556	33188.9	189703		None AMF	F	0	0.12039
EV	None AMF	4wpi	0	0																H	10.5263	15495.9	165784		None AMF	C	0	0
irCCaMK	R.irregularis	5wpi	23049.2	0																H	5.19481	28944.2	190159		None AMF	ST	1.44016	0
irCCaMK	R.irregularis	5wpi	0	0																H	9.82143	117902	386295		None AMF	ROOT	0.202907	0
irCCaMK	R.irregularis	5wpi	0	0																H	8.69565	211884	708260
irCCaMK	R.irregularis	5wpi	0	0																H	9.83607	255295	977402
irCCaMK	R.irregularis	5wpi	0	0																H	16.2963	205842	674867
irCCaMK	R.irregularis	5wpi	0	0																H	14.1509	222387	803282
irCCaMK	R.irregularis	5wpi	0	0																H	9.16667	71893.3	547292
irCCaMK	R.irregularis	5wpi	0	0																H	10.4167	115149	525840
EV	R.irregularis	5wpi	1.55686e+06	708204																H	3.65854	230316	788239
EV	R.irregularis	5wpi	1.42667e+06	693588																H	16.7939	665447	1.35085e+06
EV	R.irregularis	5wpi	1.35085e+06	665447																H	15.3374	186850	504482
EV	R.irregularis	5wpi	1.09284e+06	506266																H	17.8161	506266	1.09284e+06
EV	R.irregularis	5wpi	672632	349021																H	4.66667	729204	2.85759e+06
EV	None AMF	5wpi	0	0																H	9.34066	708204	1.42667e+06
EV	None AMF	5wpi	0	0																H	6.62252	349021	672632
EV	None AMF	5wpi	0	0																H	6.60377	693588	1.55686e+06
EV	None AMF	5wpi	0	0																H	8.37989	187698	649907
irCCaMK	R.irregularis	6wpi	0	0																H	16.4179	278943	883295
irCCaMK	R.irregularis	6wpi	0	0																H	3.59712	136524	417773
irCCaMK	R.irregularis	6wpi	0	0																H	4.91803	444300	976997
irCCaMK	R.irregularis	6wpi	0	0																H	4.51977	266397	1.24312e+06
irCCaMK	R.irregularis	6wpi	0	0																H	20.8589	1.20427e+06	3.11165e+06
irCCaMK	R.irregularis	6wpi	0	0																H	6.08696	0	61885.2
irCCaMK	R.irregularis	6wpi	0	0																H	8.44444	302952	624491
irCCaMK	R.irregularis	6wpi	0	0																H	15.8537	1.09395e+06	1.7556e+06
EV	R.irregularis	6wpi	2.42786e+06	1.26411e+06																H	13.6095	439100	786028
EV	R.irregularis	6wpi	1.57365e+06	1.05003e+06																H	8.72093	792695	2.43634e+06
EV	R.irregularis	6wpi	1.55303e+06	1.04161e+06																H	14	977817	1.29789e+06
EV	R.irregularis	6wpi	1.46119e+06	950253																H	10	1.12905e+06	1.9327e+06
EV	R.irregularis	6wpi	1.38755e+06	913075																H	10.4478	626323	1.32089e+06
EV	R.irregularis	6wpi	0	0																H	11.1111	538438	846546
EV	R.irregularis	6wpi	0	0																H	17.2222	787287	1.10769e+06
EV	R.irregularis	6wpi	0	0																H	6.55738	1.4154e+06	3.5317e+06
EV	None AMF	6wpi	0	0																H	3.1746	863944	1.13756e+06
EV	None AMF	6wpi	0	0																H	5.65217	1.34146e+06	3.60752e+06
EV	None AMF	6wpi	0	0																H	9.09091	1.08103e+06	2.75369e+06
EV	None AMF	6wpi	11086	6691.97																A	1.2987	3612.22	0
EV	None AMF	6wpi	0	0																A	2.63158	0	0
EV	None AMF	6wpi	0	0																A	1.26582	0	9633.24
irCCaMK	R.irregularis	7wpi	0	0																A	6.86275	0	0
irCCaMK	R.irregularis	7wpi	0	0																A	1.5873	2726.65	0
irCCaMK	R.irregularis	7wpi	0	0																A	5.35714	0	14952.5
irCCaMK	R.irregularis	7wpi	0	0																A	1.92308	3831.55	0
irCCaMK	R.irregularis	7wpi	0	0																A	1.35135	0	39733.7
irCCaMK	R.irregularis	7wpi	3.48374e+06	1.85854e+06																A	8.69565	19654.9	125871
irCCaMK	R.irregularis	7wpi	3.2634e+06	1.72067e+06																A	10.1695	13417.9	93387.2
irCCaMK	R.irregularis	7wpi	3.01124e+06	1.71756e+06																A	18.3099	17731.9	177799
EV	R.irregularis	7wpi	2.89035e+06	1.54662e+06																A	29.2683	24144.2	122685
EV	R.irregularis	7wpi	2.82388e+06	1390400																A	27.381	25153.3	173931
EV	R.irregularis	7wpi	2.79687e+06	1.29443e+06																A	16.6667	33188.9	189703
EV	R.irregularis	7wpi	2.41667e+06	1.28213e+06																A	10.5263	15495.9	165784
EV	R.irregularis	7wpi	1.64564e+06	1.23364e+06																A	10.3896	28944.2	190159
EV	None AMF	7wpi	0	7453.61																A	25.8929	117902	386295
EV	None AMF	7wpi	0	7280.42																A	31.8841	211884	708260
EV	None AMF	7wpi	0	0																A	28.6885	255295	977402
EV	None AMF	7wpi	0	0																A	25.9259	205842	674867
EV	None AMF	7wpi	0	0																A	19.8113	222387	803282
EV	None AMF	7wpi	0	0																A	20	71893.3	547292
EV	None AMF	7wpi	0	0																A	9.375	115149	525840
EV	None AMF	7wpi	0	0																A	42.6829	230316	788239
EV	None AMF	7wpi	0	0																A	28.2443	665447	1.35085e+06
																				A	40.4908	186850	504482
																				A	37.931	506266	1.09284e+06
																				A	39.3333	729204	2.85759e+06
																				A	50	708204	1.42667e+06
																				A	36.4238	349021	672632
																				A	45.283	693588	1.55686e+06
																				A	30.7263	187698	649907
																				A	20.398	278943	883295
																				A	25.1799	136524	417773
																				A	40.4372	444300	976997
																				A	33.8983	266397	1.24312e+06
																				A	29.4479	1.20427e+06	3.11165e+06
																				A	25.2174	0	61885.2
																				A	32.4444	302952	624491
																				A	31.7073	1.09395e+06	1.7556e+06
																				A	25.4438	439100	786028
																				A	33.7209	792695	2.43634e+06
																				A	26.6667	977817	1.29789e+06
																				A	37.0588	1.12905e+06	1.9327e+06
																				A	40.2985	626323	1.32089e+06
																				A	29.2929	538438	846546
																				A	30	787287	1.10769e+06
																				A	39.3443	1.4154e+06	3.5317e+06
																				A	44.9735	863944	1.13756e+06
																				A	42.1739	1.34146e+06	3.60752e+06
																				A	41.6667	1.08103e+06	2.75369e+06
																				V	0	3612.22	0
																				V	0	0	0
																				V	0	0	9633.24
																				V	0	0	0
																				V	0	2726.65	0
																				V	0	0	14952.5
																				V	0	3831.55	0
																				V	0	0	39733.7
																				V	7.24638	19654.9	125871
																				V	13.5593	13417.9	93387.2
																				V	9.85915	17731.9	177799
																				V	23.1707	24144.2	122685
																				V	22.619	25153.3	173931
																				V	5.55556	33188.9	189703
																				V	5.26316	15495.9	165784
																				V	11.6883	28944.2	190159
																				V	17.8571	117902	386295
																				V	21.7391	211884	708260
																				V	26.2295	255295	977402
																				V	23.7037	205842	674867
																				V	28.3019	222387	803282
																				V	25.8333	71893.3	547292
																				V	6.25	115149	525840
																				V	41.4634	230316	788239
																				V	6.87023	665447	1.35085e+06
																				V	14.7239	186850	504482
																				V	19.5402	506266	1.09284e+06
																				V	40	729204	2.85759e+06
																				V	36.2637	708204	1.42667e+06
																				V	9.93377	349021	672632
																				V	38.6792	693588	1.55686e+06
																				V	34.6369	187698	649907
																				V	19.9005	278943	883295
																				V	20.1439	136524	417773
																				V	33.8798	444300	976997
																				V	30.5085	266397	1.24312e+06
																				V	27.6074	1.20427e+06	3.11165e+06
																				V	18.2609	0	61885.2
																				V	28	302952	624491
																				V	21.9512	1.09395e+06	1.7556e+06
																				V	22.4852	439100	786028
																				V	28.4884	792695	2.43634e+06
																				V	33.3333	977817	1.29789e+06
																				V	37.0588	1.12905e+06	1.9327e+06
																				V	35.8209	626323	1.32089e+06
																				V	24.2424	538438	846546
																				V	30.5556	787287	1.10769e+06
																				V	44.8087	1.4154e+06	3.5317e+06
																				V	47.0899	863944	1.13756e+06
																				V	45.2174	1.34146e+06	3.60752e+06
																				V	47.7273	1.08103e+06	2.75369e+06
