# Supplementary material for: Blumenols as shoot markers of root symbiosis with arbuscular mycorrhizal fungi
Source: eLife. 2018 Aug 28;7:e37093. doi: 10.7554/eLife.37093 (PMC6156081; doi:10.7554/eLife.37093)
Supplement: Figure 4—source data 1. [file elife-37093-fig4-data1.xlsx]

## Sheet: Figure 4
Figure 4
Genotype	treatment	Gene	QPCR
EV	R.irregularis	CCAMK	0.0328036
EV	R.irregularis	CCAMK	0.0717936
EV	R.irregularis	CCAMK	0.125
EV	R.irregularis	CCAMK	0.133972
EV	None AMF	CCAMK	0.0272047
EV	None AMF	CCAMK	0.0418102
EV	None AMF	CCAMK	0.0908733
EV	None AMF	CCAMK	0.126745
EV	R.irregularis	PT4	3.86375
EV	R.irregularis	PT4	4.57835
EV	R.irregularis	PT4	5.54044
EV	None AMF	PT4	1.26576
EV	None AMF	PT4	1.29235
EV	None AMF	PT4	5.06303
EV	R.irregularis	RAM1	0.00708999
EV	R.irregularis	RAM1	0.01418
EV	R.irregularis	RAM1	0.111105
EV	None AMF	RAM1	0.0108964
EV	None AMF	RAM1	0.0361465
EV	None AMF	RAM1	0.036906
EV	None AMF	RAM1	0.0429857
EV	R.irregularis	STR1	0.00424506
EV	R.irregularis	STR1	0.00718897
EV	R.irregularis	STR1	0.0174576
EV	R.irregularis	STR1	0.0183255
EV	None AMF	STR1	0.0111254
EV	None AMF	STR1	0.0217929
EV	None AMF	STR1	0.0518325
EV	None AMF	STR1	0.0791098
EV	R.irregularis	Vapyrin	0.184284
EV	R.irregularis	Vapyrin	0.397768
EV	R.irregularis	Vapyrin	0.50698
EV	R.irregularis	Vapyrin	0.594604
EV	None AMF	Vapyrin	0.386891
EV	None AMF	Vapyrin	0.5
EV	None AMF	Vapyrin	0.607097
EV	None AMF	Vapyrin	0.939523
