# Supplementary material for: Blumenols as shoot markers of root symbiosis with arbuscular mycorrhizal fungi
Source: eLife. 2018 Aug 28;7:e37093. doi: 10.7554/eLife.37093 (PMC6156081; doi:10.7554/eLife.37093)
Supplement: Figure 6—figure supplement 1—source data 1. [file elife-37093-fig6-figsupp1-data1.xlsx]

## Sheet: Figure 6—figure supplement 1
Figure 6—figure supplement 1C					Figure 6—figure supplement 1D
Treatment	Genotype	leaf position	Compund 6		Content	Added compund	tissue	treatment
R.irregularis	EV	#1	912.09		0	Compund 1	Leaf	Control
R.irregularis	EV	#2	647.039		0	Compund 1	Leaf	Control
R.irregularis	EV	#3	721.174		0	Compund 1	Leaf	Control
R.irregularis	EV	#1	730.114		900842	Compund 1	Leaf	Treated
R.irregularis	EV	#2	537.735		297053	Compund 1	Leaf	Treated
R.irregularis	EV	#3	538.823		264410	Compund 1	Leaf	Treated
R.irregularis	EV	#1	570.051		0	Compund 1	Root	Control
R.irregularis	EV	#2	423.305		1.3849e+06	Compund 1	Root	Treated
R.irregularis	EV	#3	774.118		0	Compund 2	Leaf	Control
R.irregularis	EV	#1	484.235		0	Compund 2	Leaf	Control
R.irregularis	EV	#2	365.321		0	Compund 2	Leaf	Control
R.irregularis	EV	#3	367.771		178274	Compund 2	Leaf	Treated
R.irregularis	EV	#1	479.91		725517	Compund 2	Leaf	Treated
R.irregularis	EV	#2	360.554		664036	Compund 2	Leaf	Treated
R.irregularis	EV	#3	374.376		0	Compund 2	Root	Control
R.irregularis	EV	#1	547.566		84589.7	Compund 2	Root	Treated
R.irregularis	EV	#2	571.152		267917	Compund 6	Leaf	Control
R.irregularis	EV	#3	748.14		76200	Compund 6	Leaf	Control
R.irregularis	EV	#1	751.935		233895	Compund 6	Leaf	Control
R.irregularis	EV	#2	598.172		1348659	Compund 6	Leaf	Treated
R.irregularis	EV	#3	661.136		3068215	Compund 6	Leaf	Treated
R.irregularis	EV	#1	630.571		0	Compund 6	Root	Control
R.irregularis	EV	#2	509.075		394985	Compund 6	Root	Treated
R.irregularis	EV	#3	419.954
R.irregularis	EV	#1	574.22
R.irregularis	EV	#2	396.332
R.irregularis	EV	#3	480.653
R.irregularis	PDS	#1	535.632
R.irregularis	PDS	#2	253.855
R.irregularis	PDS	#3	278.975
R.irregularis	PDS	#1	653.005
R.irregularis	PDS	#2	351.745
R.irregularis	PDS	#3	842.983
R.irregularis	PDS	#1	681.888
R.irregularis	PDS	#2	312.218
R.irregularis	PDS	#3	441.709
R.irregularis	PDS	#1	473.512
R.irregularis	PDS	#2	213.147
R.irregularis	PDS	#3	277.686
R.irregularis	PDS	#1	476.645
R.irregularis	PDS	#2	189.895
R.irregularis	PDS	#3	578.038
R.irregularis	PDS	#1	700.152
R.irregularis	PDS	#2	196.122
R.irregularis	PDS	#3	578.495
R.irregularis	PDS	#1	706.033
R.irregularis	PDS	#2	332.99
R.irregularis	PDS	#3	494.315
R.irregularis	PDS	#1	699.055
R.irregularis	PDS	#2	326.629
R.irregularis	PDS	#3	630.405
R.irregularis	PDS	#1	861.765
R.irregularis	PDS	#2	253.541
R.irregularis	PDS	#3	656.097
None AMF	EV	#1	1156.79
None AMF	EV	#2	1061.77
None AMF	EV	#3	848.937
None AMF	EV	#1	1208.41
None AMF	EV	#2	986.351
None AMF	EV	#3	967.791
None AMF	EV	#1	1014.33
None AMF	EV	#2	767.519
None AMF	EV	#3	1048.51
None AMF	EV	#1	674.12
None AMF	EV	#2	556.575
None AMF	EV	#3	501.954
None AMF	EV	#1	879.975
None AMF	EV	#2	783.736
None AMF	EV	#3	679.956
None AMF	EV	#1	519.127
None AMF	EV	#2	629.583
None AMF	EV	#3	466.026
None AMF	PDS	#1	1041.34
None AMF	PDS	#2	663.655
None AMF	PDS	#3	870.82
None AMF	PDS	#1	1120.79
None AMF	PDS	#2	770.436
None AMF	PDS	#3	780.781
None AMF	PDS	#1	516.612
None AMF	PDS	#2	306.347
None AMF	PDS	#3	419.13
None AMF	PDS	#1	889.175
None AMF	PDS	#2	550.419
None AMF	PDS	#3	582.15
None AMF	PDS	#1	749.122
None AMF	PDS	#2	439.801
None AMF	PDS	#3	597.113
None AMF	PDS	#1	947.026
None AMF	PDS	#2	674.12
None AMF	PDS	#3	746.093
