# Supplementary material for: Blumenols as shoot markers of root symbiosis with arbuscular mycorrhizal fungi
Source: eLife. 2018 Aug 28;7:e37093. doi: 10.7554/eLife.37093 (PMC6156081; doi:10.7554/eLife.37093)
Supplement: Figure 6—figure supplement 2—source data 1. [file elife-37093-fig6-figsupp2-data1.xlsx]

## Sheet: Figure 6—figure supplement 2
Figure 6—figure supplement 2B					Figure 6—figure supplement 2C					Figure 6—figure supplement 2D				Figure 6—figure supplement 2E			Figure 6—figure supplement 2F							Figure 6—figure supplement 2G
Genotype	treatment	time	Compound6		Genotype	Treatment	Time	Compund 6		Genotype	AMF concentration	Compund6		Genotype	Compound6		Compound6	Ri-tub	RAM1	STR1	PT4	Vapyrin		Treatment	Tissue	Compund 6
EV	None AMF	3wpi	738.255		irCCaMK	R.irregularis	2wpi	305173		EV	Control	831082		EV	5366		738.255	0	1	0	0	4		R.irregularis	R5	488.925
EV	None AMF	3wpi	0		irCCaMK	R.irregularis	2wpi	304111		EV	Control	854638		EV	2111		0	0	1	0	0	2		R.irregularis	R5	482.557
EV	None AMF	3wpi	0		irCCaMK	R.irregularis	2wpi	302813		EV	Control	1.12741e+06		EV	4870		0	0	1	2	0	2		R.irregularis	R5	554.854
EV	R.irregularis	3wpi	4358.97		irCCaMK	R.irregularis	2wpi	292624		EV	Control	1.15653e+06		EV	3578		5483.87	3	3	4	1	3		R.irregularis	R4	581.34
EV	R.irregularis	3wpi	4607.14		irCCaMK	R.irregularis	2wpi	280954		EV	Control	1.42995e+06		EV	1400		4358.97	28	6	15	6	6		R.irregularis	R4	565.397
EV	R.irregularis	3wpi	4683.54		irCCaMK	R.irregularis	2wpi	267115		EV	Control	1.45343e+06		EV	1281		4846.63	8	7	10	3	6		R.irregularis	R4	532.655
EV	None AMF	4wpi	2626.58		irCCaMK	R.irregularis	2wpi	252202		EV	Control	1.4902e+06		EV	2746		4607.14	24	23	29	18	10		R.irregularis	R3	498.586
EV	None AMF	4wpi	5189.87		irCCaMK	R.irregularis	2wpi	244480		EV	Control	1.90939e+06		EV	2904		4683.54	47	42	58	33	13		R.irregularis	R3	528.359
EV	None AMF	4wpi	3900.24		EV	R.irregularis	2wpi	346916		EV	R.irr_1	1.35107e+06		EV	1590		5065.36	5	2	4	1	2		R.irregularis	R3	557.443
EV	R.irregularis	4wpi	7094.59		EV	R.irregularis	2wpi	303787		EV	R.irr_1	1.38117e+06		EV	2005		5189.87	0	1	1	0	3		R.irregularis	R2	482.002
EV	R.irregularis	4wpi	6257.67		EV	R.irregularis	2wpi	296424		EV	R.irr_1	1387500		EV	2946		7094.59	120	41	69	53	12		R.irregularis	R2	512.499
EV	R.irregularis	4wpi	6261.4		EV	R.irregularis	2wpi	288908		EV	R.irr_1	1.44532e+06		EV	3491		6257.67	69	65	92	57	14		R.irregularis	R2	495.682
EV	None AMF	5wpi	3504.82		EV	R.irregularis	2wpi	283328		EV	R.irr_1	1.54331e+06		EV	3323		6261.4	77	32	56	41	7		R.irregularis	R1	420.125
EV	None AMF	5wpi	6199.38		EV	R.irregularis	2wpi	272304		EV	R.irr_1	1.89536e+06		EV	5108		8056.43	165	134	232	124	29		R.irregularis	R1	451.976
EV	None AMF	5wpi	2525.95		EV	R.irregularis	2wpi	258742		EV	R.irr_1/10	350924		EV	3362		3504.82	2	3	3	1	4		R.irregularis	R1	465.493
EV	R.irregularis	5wpi	3483.87		EV	R.irregularis	2wpi	257069		EV	R.irr_1/10	859556		EV	4027		6199.38	1	3	2	0	5		R.irregularis	S1	333.562
EV	R.irregularis	5wpi	8074.53		EV	None AMF	2wpi	322087		EV	R.irr_1/10	911796		EV	4998		2525.95	3	4	5	1	3		R.irregularis	S1	58.6321
EV	R.irregularis	5wpi	3600		EV	None AMF	2wpi	301701		EV	R.irr_1/10	1.22925e+06		EV	10311		3483.87	97	131	218	68	26		R.irregularis	S1	379.734
EV	R.irregularis	5wpi	5442.18		EV	None AMF	2wpi	297374		EV	R.irr_1/20	943075		EV	6642		10034.6	402	488	676	201	71		R.irregularis	S2	255.207
EV	R.irregularis	5wpi	8852.46		EV	None AMF	2wpi	284856		EV	R.irr_1/20	991621		EV	9736		7891.57	74	92	91	28	16		R.irregularis	S2	274.063
EV	R.irregularis	5wpi	8537.41		EV	None AMF	2wpi	281381		EV	R.irr_1/20	1.0273e+06		irCCaMK	0		8074.53	130	122	189	52	23		R.irregularis	S2	286.565
EV	None AMF	6wpi	0		EV	None AMF	2wpi	276304		EV	R.irr_1/20	1.03944e+06		irCCaMK	0		3600	168	249	338	94	45		R.irregularis	S3	252.739
EV	None AMF	6wpi	4625.85		irCCaMK	R.irregularis	3wpi	585019		EV	R.irr_1/20	1.2025e+06		irCCaMK	0		5442.18	63	70	111	25	14		R.irregularis	S3	242.898
EV	None AMF	6wpi	3850.93		irCCaMK	R.irregularis	3wpi	527927		EV	R.irr_1/20	1.21653e+06		irCCaMK	0		8852.46	168	212	290	78	34		R.irregularis	S3	248.923
EV	R.irregularis	6wpi	3783.78		irCCaMK	R.irregularis	3wpi	519309		EV	R.irr_1/20	1.23871e+06		irCCaMK	0		8537.41	105	117	168	39	25		R.irregularis	S4	271.216
EV	R.irregularis	6wpi	5269.84		irCCaMK	R.irregularis	3wpi	504389		EV	R.irr_1/20	1.42581e+06		irCCaMK	0		0	1	1	3	0	2		R.irregularis	S4	299.241
EV	R.irregularis	6wpi	10561.1		irCCaMK	R.irregularis	3wpi	476422		EV	R.irr_1/40	705710		irCCaMK	0		4625.85	1	0	1	0	1		R.irregularis	S4	316.96
EV	R.irregularis	6wpi	8718.75		irCCaMK	R.irregularis	3wpi	462686		EV	R.irr_1/40	921697		irCCaMK	0		3783.78	198	218	267	75	41		R.irregularis	S5	299.226
EV	R.irregularis	6wpi	5805.37		irCCaMK	R.irregularis	3wpi	437584		EV	R.irr_1/40	990376		irCCaMK	0		5269.84	296	357	461	141	56		R.irregularis	S5	275.665
EV	None AMF	7wpi	2747.6		irCCaMK	R.irregularis	3wpi	418096		EV	R.irr_1/40	1.08452e+06		irCCaMK	0		5048.54	139	144	186	57	29		R.irregularis	S5	312.129
EV	None AMF	7wpi	2134.15		EV	R.irregularis	3wpi	549295		EV	R.irr_1/40	1.15209e+06		irCCaMK	0		10561.1	592	617	653	269	89		R.irregularis	S6	371.956
EV	None AMF	7wpi	3117.28		EV	R.irregularis	3wpi	548732		EV	R.irr_1/40	1.32731e+06		irCCaMK	0		8718.75	191	218	242	79	38		R.irregularis	S6	303.79
EV	None AMF	7wpi	2516.56		EV	R.irregularis	3wpi	535194		EV	R.irr_1/40	1.33614e+06		irCCaMK	0		5805.37	185	223	324	74	43		R.irregularis	S6	326.877
EV	R.irregularis	7wpi	8853.5		EV	R.irregularis	3wpi	535000		EV	R.irr_1/60	778191		irCCaMK	0		10185.2	832	760	1017	380	101		R.irregularis	S7	350.073
EV	R.irregularis	7wpi	6097.56		EV	R.irregularis	3wpi	440821		EV	R.irr_1/60	939517		irCCaMK	0		8853.5	495	388	422	161	64		R.irregularis	S7	391.348
EV	R.irregularis	7wpi	8830.77		EV	R.irregularis	3wpi	440556		EV	R.irr_1/60	1.05404e+06		irCCaMK	0		6097.56	1097	787	885	215	115		R.irregularis	S7	371.338
EV	R.irregularis	7wpi	5674.85		EV	R.irregularis	3wpi	431198		EV	R.irr_1/60	1.1591e+06		irCCaMK	0		8830.77	1144	765	879	272	104		R.irregularis	FB	38.4155
EV	R.irregularis	7wpi	12064		EV	R.irregularis	3wpi	425998		EV	R.irr_1/60	1.30981e+06					5674.85	393	416	541	139	71		R.irregularis	FB	41.8271
					EV	None AMF	3wpi	617839		EV	R.irr_1/60	1.36586e+06					12064	792	413	37	154	67		R.irregularis	FB	102.022
					EV	None AMF	3wpi	604514		EV	R.irr_1/60	1.43867e+06					9262.82	179	39	62	28	12		R.irregularis	F	43.8318
					EV	None AMF	3wpi	564754																R.irregularis	F	364.9
					EV	None AMF	3wpi	557749																R.irregularis	F	42.9642
					EV	None AMF	3wpi	510595																R.irregularis	C	59.1312
					EV	None AMF	3wpi	495368																R.irregularis	C	54.2122
					irCCaMK	R.irregularis	4wpi	912958																R.irregularis	C	73.546
					irCCaMK	R.irregularis	4wpi	878925																R.irregularis	ST	73.4809
					irCCaMK	R.irregularis	4wpi	853960																R.irregularis	ST	79.8543
					irCCaMK	R.irregularis	4wpi	852864																R.irregularis	ST	72.9225
					irCCaMK	R.irregularis	4wpi	813199																R.irregularis	ROOT	8.67247
					irCCaMK	R.irregularis	4wpi	784487																R.irregularis	ROOT	8.27196
					irCCaMK	R.irregularis	4wpi	739483																R.irregularis	ROOT	6.84836
					irCCaMK	R.irregularis	4wpi	550853																None AMF	R5	698.117
					EV	R.irregularis	4wpi	1.03869e+06																None AMF	R4	728.208
					EV	R.irregularis	4wpi	1.02012e+06																None AMF	R3	680.733
					EV	R.irregularis	4wpi	959714																None AMF	R2	737.482
					EV	R.irregularis	4wpi	935387																None AMF	R1	514.985
					EV	R.irregularis	4wpi	909504																None AMF	S1	515.386
					EV	R.irregularis	4wpi	900023																None AMF	S2	433.996
					EV	R.irregularis	4wpi	896045																None AMF	S3	394.204
					EV	R.irregularis	4wpi	759109																None AMF	S4	422.438
					EV	None AMF	4wpi	1.02479e+06																None AMF	S5	438.081
					EV	None AMF	4wpi	863496																None AMF	S6	352.958
					EV	None AMF	4wpi	795235																None AMF	S7	398.826
					EV	None AMF	4wpi	768620																None AMF	FB	49.2953
					EV	None AMF	4wpi	652516																None AMF	F	53.9504
					EV	None AMF	4wpi	639676																None AMF	C	59.3494
					irCCaMK	R.irregularis	5wpi	1.65517e+06																None AMF	ST	82.0656
					irCCaMK	R.irregularis	5wpi	1.44879e+06																None AMF	ROOT	2.62752
					irCCaMK	R.irregularis	5wpi	1.43664e+06
					irCCaMK	R.irregularis	5wpi	1.37225e+06
					irCCaMK	R.irregularis	5wpi	1.29166e+06
					irCCaMK	R.irregularis	5wpi	1.28487e+06
					irCCaMK	R.irregularis	5wpi	1.21879e+06
					irCCaMK	R.irregularis	5wpi	917043
					EV	R.irregularis	5wpi	1.41194e+06
					EV	R.irregularis	5wpi	1.37432e+06
					EV	R.irregularis	5wpi	1.35338e+06
					EV	R.irregularis	5wpi	1.3495e+06
					EV	R.irregularis	5wpi	1.26547e+06
					EV	None AMF	5wpi	1.73839e+06
					EV	None AMF	5wpi	1.53238e+06
					EV	None AMF	5wpi	1.46713e+06
					EV	None AMF	5wpi	1.45457e+06
					irCCaMK	R.irregularis	6wpi	1.95685e+06
					irCCaMK	R.irregularis	6wpi	1.49395e+06
					irCCaMK	R.irregularis	6wpi	1.4752e+06
					irCCaMK	R.irregularis	6wpi	1.40284e+06
					irCCaMK	R.irregularis	6wpi	1.3747e+06
					irCCaMK	R.irregularis	6wpi	1302000
					irCCaMK	R.irregularis	6wpi	1.24593e+06
					irCCaMK	R.irregularis	6wpi	863345
					EV	R.irregularis	6wpi	1.57827e+06
					EV	R.irregularis	6wpi	1.3304e+06
					EV	R.irregularis	6wpi	1.21009e+06
					EV	R.irregularis	6wpi	1.00242e+06
					EV	R.irregularis	6wpi	916069
					EV	R.irregularis	6wpi	889716
					EV	R.irregularis	6wpi	871993
					EV	R.irregularis	6wpi	681923
					EV	None AMF	6wpi	1.98204e+06
					EV	None AMF	6wpi	1.77047e+06
					EV	None AMF	6wpi	1.67645e+06
					EV	None AMF	6wpi	1.54096e+06
					EV	None AMF	6wpi	1.51351e+06
					EV	None AMF	6wpi	804787
					irCCaMK	R.irregularis	7wpi	1.40286e+06
					irCCaMK	R.irregularis	7wpi	1.37506e+06
					irCCaMK	R.irregularis	7wpi	1.29743e+06
					irCCaMK	R.irregularis	7wpi	1.27585e+06
					irCCaMK	R.irregularis	7wpi	1.14881e+06
					irCCaMK	R.irregularis	7wpi	1.00218e+06
					irCCaMK	R.irregularis	7wpi	929534
					irCCaMK	R.irregularis	7wpi	723423
					EV	R.irregularis	7wpi	2.19952e+06
					EV	R.irregularis	7wpi	1.90978e+06
					EV	R.irregularis	7wpi	1.61397e+06
					EV	R.irregularis	7wpi	1.60153e+06
					EV	R.irregularis	7wpi	1.57377e+06
					EV	R.irregularis	7wpi	1.56357e+06
					EV	R.irregularis	7wpi	1.20615e+06
					EV	R.irregularis	7wpi	1.1419e+06
					EV	None AMF	7wpi	1.8429e+06
					EV	None AMF	7wpi	1.76951e+06
					EV	None AMF	7wpi	1.60294e+06
					EV	None AMF	7wpi	1.59036e+06
					EV	None AMF	7wpi	1.5219e+06
					EV	None AMF	7wpi	979947
