# Supplementary material for: Blumenols as shoot markers of root symbiosis with arbuscular mycorrhizal fungi
Source: eLife. 2018 Aug 28;7:e37093. doi: 10.7554/eLife.37093 (PMC6156081; doi:10.7554/eLife.37093)
Supplement: Figure 6—source data 1. [file elife-37093-fig6-data1.xlsx]

## Sheet: Figure 6
Figure 6B
Treatment	Genotype	leaf position	Compund 1	Compund 2
R.irregularis	EV	#1	1220.66	531.02
R.irregularis	EV	#2	1065.19	476.248
R.irregularis	EV	#3	885.507	471.821
R.irregularis	EV	#1	1119.64	412.748
R.irregularis	EV	#2	915.287	459.771
R.irregularis	EV	#3	1252.61	476.496
R.irregularis	EV	#1	576.284	510.97
R.irregularis	EV	#2	705.932	305.56
R.irregularis	EV	#3	742.87	754.375
R.irregularis	EV	#1	593.671	210.684
R.irregularis	EV	#2	696.674	347.366
R.irregularis	EV	#3	489.422	227.06
R.irregularis	EV	#1	958.784	355.473
R.irregularis	EV	#2	669.369	340.069
R.irregularis	EV	#3	629.337	310.676
R.irregularis	EV	#1	416.963	141.718
R.irregularis	EV	#2	724.73	120.631
R.irregularis	EV	#3	410.624	180.968
R.irregularis	EV	#1	409.914	372.165
R.irregularis	EV	#2	541.437	334.642
R.irregularis	EV	#3	584.28	396.667
R.irregularis	EV	#1	846.651	294.263
R.irregularis	EV	#2	798.947	315.192
R.irregularis	EV	#3	1076.16	331.024
R.irregularis	EV	#1	522.89	214.922
R.irregularis	EV	#2	554.125	206.863
R.irregularis	EV	#3	514.418	161.781
R.irregularis	PDS	#1	229.414	89.3816
R.irregularis	PDS	#2	152.856	56.3888
R.irregularis	PDS	#3	289.325	110.018
R.irregularis	PDS	#1	662.472	628.986
R.irregularis	PDS	#2	975.928	515.809
R.irregularis	PDS	#3	1195.89	716.27
R.irregularis	PDS	#1	862.743	385.392
R.irregularis	PDS	#2	722.812	274.305
R.irregularis	PDS	#3	835.016	334.022
R.irregularis	PDS	#1	592.301	363.006
R.irregularis	PDS	#2	591.701	439.046
R.irregularis	PDS	#3	735.059	299.585
R.irregularis	PDS	#1	928.123	498.684
R.irregularis	PDS	#2	530.647	341.983
R.irregularis	PDS	#3	702.777	693.311
R.irregularis	PDS	#1	968.671	517.339
R.irregularis	PDS	#2	844.749	467.729
R.irregularis	PDS	#3	1160.51	750.215
R.irregularis	PDS	#1	983.158	314.494
R.irregularis	PDS	#2	1408.48	297.345
R.irregularis	PDS	#3	1083.43	345.375
R.irregularis	PDS	#1	191.722	114.583
R.irregularis	PDS	#2	435.612	108.546
R.irregularis	PDS	#3	192.62	107.783
R.irregularis	PDS	#1	1470.97	462.454
R.irregularis	PDS	#2	728.56	290.638
R.irregularis	PDS	#3	861.992	495.649
None AMF	EV	#1	0	0
None AMF	EV	#2	0	0
None AMF	EV	#3	0	0
None AMF	EV	#1	0	0
None AMF	EV	#2	0	0
None AMF	EV	#3	0	0
None AMF	EV	#1	0	0
None AMF	EV	#2	0	0
None AMF	EV	#3	0	4.86189
None AMF	EV	#1	0	0
None AMF	EV	#2	0	0
None AMF	EV	#3	0	0
None AMF	EV	#1	0	0
None AMF	EV	#2	0	0
None AMF	EV	#3	0	0
None AMF	EV	#1	0	0
None AMF	EV	#2	0	0
None AMF	EV	#3	0	0
None AMF	PDS	#1	0	0
None AMF	PDS	#2	0	0
None AMF	PDS	#3	0	0
None AMF	PDS	#1	0	0
None AMF	PDS	#2	0	0
None AMF	PDS	#3	0	0
None AMF	PDS	#1	0	7.75811
None AMF	PDS	#2	0	0
None AMF	PDS	#3	0	0
None AMF	PDS	#1	0	0
None AMF	PDS	#2	0	0
None AMF	PDS	#3	0	0
None AMF	PDS	#1	0	0
None AMF	PDS	#2	0	0
None AMF	PDS	#3	0	0
None AMF	PDS	#1	0	0
None AMF	PDS	#2	0	0
None AMF	PDS	#3	0	0
