# Supplementary material for: Blumenols as shoot markers of root symbiosis with arbuscular mycorrhizal fungi
Source: eLife. 2018 Aug 28;7:e37093. doi: 10.7554/eLife.37093 (PMC6156081; doi:10.7554/eLife.37093)
Supplement: Figure 7—figure supplement 1—source data 1. [file elife-37093-fig7-figsupp1-data1.xlsx]

## Sheet: Figure 7—figure supplement 1
Figure 7—figure supplement 1B
Genotype	Ri-TUB	RAM1	Vapyrin	STR1	PT4	NOPE1_ROOT	NOPE1_LEAF
az	1.12506	1.30134	1.12506	1.18099	0.965936	1.95884	1.5932
az	0.926588	1.26576	1.18921	1.07923	1.12506	1.37554	2.04476
az	1.00696	0.986233	0.823591	0.876606	0.82932	1.60214	1.08067
az	1.04247	1.21689	1.21419	1.26576	1.17283	1.10957	0.947323
az	1.03526	1.1487	1.13288	1.15669	1.19748	1.67018
az	1.18099	1.37554	1.3566	1.34723	1.40444	1.54756	1.06579
az	0.773782	0.795536	0.582367	0.570382	0.790041
az	0.986233	1.07694	0.80107	0.757858	0.712025
ut	0.768438	1.05702	0.852635	0.835088	0.806642	0.835088	1.46604
ut	0.50698	0.858565	0.920188	0.628507	0.721965	1.50525	1.35842
ut	0.574349	0.959264	0.74532	0.659754	0.692555	1.07923	1.43587
ut	0.456916	0.678302	0.742262	0.482968	0.547147	0.646176	1.07321
ut	0.411796	0.550953	0.535887	0.389582	0.469761	0.697372	2.05898
ut	0.543367	0.664343	0.752623	0.510506	0.496546	1.47427	1.76777
ut	0.586417	0.858565	0.926588	0.395021	0.528509
ut	0.476319	0.582367	0.5	0.353553	0.57634
