# Supplementary material for: Blumenols as shoot markers of root symbiosis with arbuscular mycorrhizal fungi
Source: eLife. 2018 Aug 28;7:e37093. doi: 10.7554/eLife.37093 (PMC6156081; doi:10.7554/eLife.37093)
Supplement: Figure 7—figure supplement 2—source data 1. [file elife-37093-fig7-figsupp2-data1.xlsx]

## Sheet: Figure 7—figure supplement 2
Figure 7—figure supplement 2
Species	Treatment	Compund	tissue	Content
S. tuberosum	F. mosseae	2	leaf	1632.01
S. tuberosum	F. mosseae	2	leaf	2053.69
S. tuberosum	F. mosseae	2	leaf	4888.64
S. tuberosum	F. mosseae	2	leaf	2538.13
S. tuberosum	F. mosseae	2	leaf	2124.33
S. tuberosum	Control	2	leaf	0
S. tuberosum	Control	2	leaf	0
S. tuberosum	Control	2	leaf	128.345
S. tuberosum	Control	2	leaf	74.6803
S. tuberosum	Control	2	leaf	0
S. lycopersicum	F. mosseae	2	leaf	231.309
S. lycopersicum	F. mosseae	2	leaf	180.422
S. lycopersicum	F. mosseae	2	leaf	173.341
S. lycopersicum	F. mosseae	2	leaf	99.1055
S. lycopersicum	F. mosseae	2	leaf	150.624
S. lycopersicum	Control	2	leaf	21.351
S. lycopersicum	Control	2	leaf	13.9085
S. lycopersicum	Control	2	leaf	0
S. lycopersicum	Control	2	leaf	0
S. lycopersicum	Control	2	leaf	0
M. truncatula	G.versiforme	11	leaf	393.175
M. truncatula	G.versiforme	11	leaf	397.623
M. truncatula	G.versiforme	11	leaf	402.07
M. truncatula	Control	11	leaf	14.2064
M. truncatula	Control	11	leaf	20.2934
M. truncatula	Control	11	leaf	19.5088
B. distachyo	G.versiforme	5	leaf	29.8652
B. distachyo	G.versiforme	5	leaf	28.4995
B. distachyo	G.versiforme	5	leaf	30.9903
B. distachyo	G.versiforme	5	leaf	21.7152
B. distachyo	G.versiforme	5	leaf	16.8297
B. distachyo	Control	5	leaf	1.1436
B. distachyo	Control	5	leaf	1.09138
B. distachyo	Control	5	leaf	0.857061
B. distachyo	Control	5	leaf	1.0247
T. aestivum	R. irregularis	8	leaf	2.38877
T. aestivum	R. irregularis	8	leaf	0.465633
T. aestivum	R. irregularis	8	leaf	2.68935
T. aestivum	R. irregularis	8	leaf	1.41926
T. aestivum	R. irregularis	8	leaf	1.03799
T. aestivum	R. irregularis	8	leaf	0.412088
T. aestivum	R. irregularis	8	leaf	1.59241
T. aestivum	R. irregularis	8	leaf	4.77573
T. aestivum	R. irregularis	8	leaf	4.68842
T. aestivum	R. irregularis	8	leaf	2.1442
T. aestivum	Control	8	leaf	0
T. aestivum	Control	8	leaf	0
T. aestivum	Control	8	leaf	0
T. aestivum	Control	8	leaf	0
T. aestivum	Control	8	leaf	0
T. aestivum	Control	8	leaf	0
T. aestivum	Control	8	leaf	0
T. aestivum	Control	8	leaf	0
T. aestivum	Control	8	leaf	0
T. aestivum	Control	8	leaf	0
T. aestivum	R. irregularis	8	root	2066.17
T. aestivum	R. irregularis	8	root	1197.86
T. aestivum	R. irregularis	8	root	2132.15
T. aestivum	R. irregularis	8	root	2607.98
T. aestivum	R. irregularis	8	root	1073.57
T. aestivum	R. irregularis	8	root	1358.6
T. aestivum	R. irregularis	8	root	3800.75
T. aestivum	R. irregularis	8	root	1508.63
T. aestivum	R. irregularis	8	root	4684.77
T. aestivum	R. irregularis	8	root	2199.06
T. aestivum	Control	8	root	5.04196
T. aestivum	Control	8	root	3.02404
T. aestivum	Control	8	root	2.82267
T. aestivum	Control	8	root	0
T. aestivum	Control	8	root	6.62768
T. aestivum	Control	8	root	7.47434
H. vulgar	R. irregularis	9	leaf	2.26177
H. vulgar	R. irregularis	9	leaf	3.08651
H. vulgar	R. irregularis	9	leaf	3.43659
H. vulgar	R. irregularis	9	leaf	2.38853
H. vulgar	R. irregularis	9	leaf	3.79411
H. vulgar	R. irregularis	9	leaf	3.36754
H. vulgar	Control	9	leaf	0
H. vulgar	Control	9	leaf	0
H. vulgar	Control	9	leaf	0
H. vulgar	Control	9	leaf	0
H. vulgar	Control	9	leaf	0
H. vulgar	R. irregularis	9	root	18.2287
H. vulgar	R. irregularis	9	root	11.0423
H. vulgar	R. irregularis	9	root	21.6477
H. vulgar	R. irregularis	9	root	15.6612
H. vulgar	R. irregularis	9	root	6.51867
H. vulgar	R. irregularis	9	root	11.8127
H. vulgar	R. irregularis	9	root	12.1193
H. vulgar	Control	9	root	0
H. vulgar	Control	9	root	0
H. vulgar	Control	9	root	0
H. vulgar	Control	9	root	0
H. vulgar	Control	9	root	0
H. vulgar	Control	9	root	0
H. vulgar	R. irregularis	10	leaf	21.0863
H. vulgar	R. irregularis	10	leaf	25.4281
H. vulgar	R. irregularis	10	leaf	39.4476
H. vulgar	R. irregularis	10	leaf	46.2433
H. vulgar	R. irregularis	10	leaf	30.0724
H. vulgar	R. irregularis	10	leaf	28.4886
H. vulgar	Control	10	leaf	3.69743
H. vulgar	Control	10	leaf	3.39984
H. vulgar	Control	10	leaf	3.41447
H. vulgar	Control	10	leaf	5.34522
H. vulgar	Control	10	leaf	4.50537
H. vulgar	R. irregularis	10	root	3563.66
H. vulgar	R. irregularis	10	root	2010.28
H. vulgar	R. irregularis	10	root	2417.8
H. vulgar	R. irregularis	10	root	2812.33
H. vulgar	R. irregularis	10	root	1466.46
H. vulgar	R. irregularis	10	root	1686.53
H. vulgar	R. irregularis	10	root	2597.11
H. vulgar	Control	10	root	184.004
H. vulgar	Control	10	root	534.124
H. vulgar	Control	10	root	742.649
H. vulgar	Control	10	root	599.628
H. vulgar	Control	10	root	547.672
H. vulgar	Control	10	root	335.425
