# Supplementary material for: Blumenols as shoot markers of root symbiosis with arbuscular mycorrhizal fungi
Source: eLife. 2018 Aug 28;7:e37093. doi: 10.7554/eLife.37093 (PMC6156081; doi:10.7554/eLife.37093)
Supplement: Figure 7—source data 1. [file elife-37093-fig7-data1.xlsx]

## Sheet: Figure 7
Figure 7A							Figure 7C				Figure 7E		Figure 7F
Genotype	H	H+A	H+V	H+A+V	T		Tissue	Genotype	compound 2		Candidate genes from QTL analysis		Species	Treatment	Compund	tissue	Content
AZ	9.81595	35.5828	1.22699	34.9693	81.5951		leaf	AZ	3.2728		NIATv7_g02220		S. lycopersicum	R. irregularis	2	leaf	515.973
AZ	9.44444	24.4444	6.66667	47.7778	88.3333		leaf	AZ	2.45733		NIATv7_g02221		S. lycopersicum	R. irregularis	2	leaf	675.198
AZ	17.0588	18.2353	8.23529	46.4706	90		leaf	AZ	2.98935		NIATv7_g02226		S. lycopersicum	R. irregularis	2	leaf	616.951
AZ	7.97101	16.6667	7.24638	52.1739	84.058		leaf	AZ	3.08064		NIATv7_g02227		S. lycopersicum	R. irregularis	2	leaf	611.838
UT	20.3947	21.0526	16.4474	21.7105	79.6053		leaf	AZ	3.18119		NIATv7_g02228		S. lycopersicum	R. irregularis	2	leaf	382.599
UT	21.2121	18.1818	9.84848	26.5152	75.7576		leaf	AZ	1.23848		NIATv7_g02229		S. lycopersicum	R. irregularis	2	leaf	467.612
UT	26.087	5.43478	11.9565	33.6957	77.1739		leaf	AZ	1.72851		NIATv7_g02230		S. lycopersicum	Control	2	leaf	0
UT	28.125	11.7188	17.1875	17.9688	75		leaf	AZ	2.60782		NIATv7_g02241		S. lycopersicum	Control	2	leaf	0
							leaf	UT	1.79656		NIATv7_g02242		S. lycopersicum	Control	2	leaf	0
							leaf	UT	0.997823		NIATv7_g02243		S. lycopersicum	Control	2	leaf	0
							leaf	UT	1.79442		NIATv7_g02244		S. lycopersicum	Control	2	leaf	0
							leaf	UT	1.15951		NIATv7_g02245		S. lycopersicum	Control	2	leaf	0
							leaf	UT	1.23244		NIATv7_g02911		M. truncatula	G.versiforme	7	leaf	3955.59
							leaf	UT	1.90147		NIATv7_g02912		M. truncatula	G.versiforme	7	leaf	2866.28
							leaf	UT	1.30669		NIATv7_g02913		M. truncatula	G.versiforme	7	leaf	4178.59
							leaf	UT	2.89603		NIATv7_g02914		M. truncatula	Control	7	leaf	467.634
							root	AZ	6.39009		NIATv7_g02915		M. truncatula	Control	7	leaf	512.8
							root	AZ	3.06979		NIATv7_g02916		M. truncatula	Control	7	leaf	366.743
							root	AZ	6.44883		NIATv7_g04077		M. truncatula	G.versiforme	11	leaf	393.175
							root	AZ	3.15596		NIATv7_g04078		M. truncatula	G.versiforme	11	leaf	397.623
							root	AZ	6.12576		NIATv7_g04079		M. truncatula	G.versiforme	11	leaf	402.07
							root	AZ	4.74663		NIATv7_g04868		M. truncatula	Control	11	leaf	14.2064
							root	AZ	6.09299		NIATv7_g08325		M. truncatula	Control	11	leaf	20.2934
							root	AZ	5.57084		NIATv7_g11088		M. truncatula	Control	11	leaf	19.5088
							root	UT	1.98511		NIATv7_g11090		B. distachyo	G.versiforme	2	leaf	191.14
							root	UT	1.50589		NIATv7_g11091		B. distachyo	G.versiforme	2	leaf	142.747
							root	UT	1.88168		NIATv7_g11092		B. distachyo	G.versiforme	2	leaf	182.181
							root	UT	1.6905		NIATv7_g13928		B. distachyo	G.versiforme	2	leaf	107.013
							root	UT	2.24641		NIATv7_g13929		B. distachyo	G.versiforme	2	leaf	102.034
							root	UT	2.3358		NIATv7_g13930		B. distachyo	Control	2	leaf	0
							root	UT	3.37762		NIATv7_g13931		B. distachyo	Control	2	leaf	0
							root	UT	1.61282		NIATv7_g14781		B. distachyo	Control	2	leaf	0
											NIATv7_g14782		B. distachyo	Control	2	leaf	0
											NIATv7_g15015		B. distachyo	G.versiforme	7	leaf	4374.15
											NIATv7_g15016		B. distachyo	G.versiforme	7	leaf	3710.05
											NIATv7_g17099		B. distachyo	G.versiforme	7	leaf	4146.74
											NIATv7_g19376		B. distachyo	G.versiforme	7	leaf	2894.67
											NIATv7_g20307		B. distachyo	G.versiforme	7	leaf	2480.44
											NIATv7_g20309		B. distachyo	Control	7	leaf	188.495
											NIATv7_g20604		B. distachyo	Control	7	leaf	174.518
											NIATv7_g20605		B. distachyo	Control	7	leaf	149.065
											NIATv7_g20940		B. distachyo	Control	7	leaf	174.877
											NIATv7_g20941		H. vulgar	R. irregularis	1	leaf	1.89182
											NIATv7_g21787		H. vulgar	R. irregularis	1	leaf	93.2978
											NIATv7_g21940		H. vulgar	R. irregularis	1	leaf	180.866
											NIATv7_g21941		H. vulgar	R. irregularis	1	leaf	174.528
											NIATv7_g23139		H. vulgar	R. irregularis	1	leaf	291.707
											NIATv7_g23140		H. vulgar	R. irregularis	1	leaf	175.633
											NIATv7_g23141		H. vulgar	R. irregularis	1	leaf	117.917
											NIATv7_g24178		H. vulgar	Control	1	leaf	8.19341
											NIATv7_g24179		H. vulgar	Control	1	leaf	1.07826
											NIATv7_g28040		H. vulgar	Control	1	leaf	0.900273
											NIATv7_g29101		H. vulgar	Control	1	leaf	0.545474
											NIATv7_g29102		H. vulgar	R. irregularis	1	root	3147.08
											NIATv7_g29104		H. vulgar	R. irregularis	1	root	1394.65
											NIATv7_g29105		H. vulgar	R. irregularis	1	root	3017.13
											NIATv7_g29106		H. vulgar	R. irregularis	1	root	1599.04
											NIATv7_g29393		H. vulgar	R. irregularis	1	root	1526.45
											NIATv7_g29394		H. vulgar	R. irregularis	1	root	1819.52
											NIATv7_g29397		H. vulgar	R. irregularis	1	root	1476.52
											NIATv7_g29398		H. vulgar	Control	1	root	0
											NIATv7_g31916		H. vulgar	Control	1	root	0
											NIATv7_g32595		H. vulgar	Control	1	root	0
											NIATv7_g32596		H. vulgar	Control	1	root	0
											NIATv7_g32597		H. vulgar	Control	1	root	0
											NIATv7_g33257		H. vulgar	Control	1	root	0
											NIATv7_g38655		T. aestivum	R. irregularis	1	leaf	78.0339
											NIATv7_g38656		T. aestivum	R. irregularis	1	leaf	34.5444
											NIATv7_g38659		T. aestivum	R. irregularis	1	leaf	43.4832
											NIATv7_g40707		T. aestivum	R. irregularis	1	leaf	95.7393
											NIATv7_g40708		T. aestivum	R. irregularis	1	leaf	44.3999
											NIATv7_g41718		T. aestivum	R. irregularis	1	leaf	54.5892
											NIATv7_g41770		T. aestivum	R. irregularis	1	leaf	123.193
											NIATv7_g53748		T. aestivum	R. irregularis	1	leaf	141.092
											NIATv7_g53942		T. aestivum	R. irregularis	1	leaf	109.009
											NIATv7_g59255		T. aestivum	R. irregularis	1	leaf	157.698
											NIATv7_g60400		T. aestivum	Control	1	leaf	21.6345
											NIATv7_g62549		T. aestivum	Control	1	leaf	18.9207
											NIATv7_g62596		T. aestivum	Control	1	leaf	3.67031
											NIATv7_g62650		T. aestivum	Control	1	leaf	7.34276
											NIATv7_g62654		T. aestivum	Control	1	leaf	2.06016
											NIATv7_g62655		T. aestivum	Control	1	leaf	9.80705
											NIATv7_g62657		T. aestivum	Control	1	leaf	4.84332
											NIATv7_g62668		T. aestivum	Control	1	leaf	4.77736
											NIATv7_g62672		T. aestivum	Control	1	leaf	16.9004
											NIATv7_g62675		T. aestivum	Control	1	leaf	9.87816
											NIATv7_g62695		T. aestivum	R. irregularis	1	root	1947.99
											NIATv7_g62736		T. aestivum	R. irregularis	1	root	1086.66
											NIATv7_g62740		T. aestivum	R. irregularis	1	root	1481.16
											NIATv7_g65964		T. aestivum	R. irregularis	1	root	1592.14
											NIATv7_g65965		T. aestivum	R. irregularis	1	root	1568.1
											NIATv7_g65966		T. aestivum	R. irregularis	1	root	1620.15
													T. aestivum	R. irregularis	1	root	3426.51
													T. aestivum	R. irregularis	1	root	1996
													T. aestivum	R. irregularis	1	root	2895.15
													T. aestivum	R. irregularis	1	root	2318.87
													T. aestivum	Control	1	root	4.28105
													T. aestivum	Control	1	root	2.20836
													T. aestivum	Control	1	root	4.58233
													T. aestivum	Control	1	root	2.26838
													T. aestivum	Control	1	root	2.78464
													T. aestivum	Control	1	root	6.57094
													S. lycopersicum	R. irregularis	2	leaf	477.392
													S. lycopersicum	R. irregularis	2	leaf	430.247
													S. lycopersicum	R. irregularis	2	leaf	270.122
													S. lycopersicum	R. irregularis	2	leaf	233.283
													S. lycopersicum	R. irregularis	2	leaf	433.994
													S. lycopersicum	R. irregularis	2	leaf	189.397
													S. lycopersicum	R. irregularis	2	leaf	373.599
													S. lycopersicum	R. irregularis	2	leaf	226.744
													S. lycopersicum	R. irregularis	2	leaf	317.232
													S. lycopersicum	R. irregularis	2	leaf	383.266
													S. lycopersicum	Control	2	leaf	0
													S. lycopersicum	Control	2	leaf	0
													S. lycopersicum	Control	2	leaf	0
													S. lycopersicum	Control	2	leaf	0
													S. lycopersicum	Control	2	leaf	2.20047
													S. lycopersicum	Control	2	leaf	0
													S. lycopersicum	Control	2	leaf	0
													S. lycopersicum	Control	2	leaf	0
													S. lycopersicum	Control	2	leaf	0
													S. lycopersicum	Control	2	leaf	0
													S. lycopersicum	R. irregularis	2	root	148.909
													S. lycopersicum	R. irregularis	2	root	106.37
													S. lycopersicum	R. irregularis	2	root	167.67
													S. lycopersicum	R. irregularis	2	root	306.283
													S. lycopersicum	R. irregularis	2	root	188.41
													S. lycopersicum	R. irregularis	2	root	133.676
													S. lycopersicum	R. irregularis	2	root	163.435
													S. lycopersicum	R. irregularis	2	root	199.144
													S. lycopersicum	R. irregularis	2	root	107.151
													S. lycopersicum	R. irregularis	2	root	169.67
													S. lycopersicum	Control	2	root	0
													S. lycopersicum	Control	2	root	0
													S. lycopersicum	Control	2	root	0
													S. lycopersicum	Control	2	root	0
													S. lycopersicum	Control	2	root	0
													S. lycopersicum	Control	2	root	0
													S. lycopersicum	Control	2	root	0
													S. lycopersicum	Control	2	root	0
													S. lycopersicum	Control	2	root	0
													S. lycopersicum	Control	2	root	0
